# Supplementary material
Source: PubMed Central journal article supplement (PMC2629246)
Supplement: 0806649105_ST2_PDF.pdf [file 0806649105_ST2_PDF.pdf]

Table S2. Statistics of the piecewise regression analysis between sprat abundance and zooplankton dynamics

| Dependent variable                | Break-point | Expl. Var. | Parameters regression 1 |          |       |         | Parameters regression 2 |          |       |          |
|-----------------------------------|-------------|------------|-------------------------|----------|-------|---------|-------------------------|----------|-------|----------|
|                                   |             |            | a                       | st. err. | b     | st.err. | a                       | st. err. | b     | st. err. |
| Zooplankton biomass (n=29)        | 17.70       | 82.26%     | 385.21                  | 93.23    | -4.42 | 9.74    | 446.23                  | 73.91    | -6.29 | 2.51     |
| % cladocerans (n=29)              | 17.70       | 81.16%     | 44.85                   | 16.98    | 0.81  | 1.77    | 76.17                   | 21.25    | -1.60 | 0.72     |
| % old copepod stages (n=29)       | 17.70       | 79.24%     | 47.28                   | 9.63     | 0.19  | 1.01    | 65.61                   | 9.09     | -0.54 | 0.31     |
| % old copepod stages 0-50m (n=25) | 16.74       | 85.46%     | 56.21                   | 9.71     | 0.44  | 1.01    | 91.24                   | 13.50    | -1.25 | 0.46     |
| PC1 zooplankton (n= 29)           | 17.69       | 83.91%     | 0.33                    | 0.82     | 0.00  | 0.09    | 1.51                    | 0.65     | -0.07 | 0.02     |

Break-point values, explained variance of the models, and the parameters of the two linear regressions separated by the models are shown. The independent variable is sprat abundance ( $10^{10}$  individuals).
