# Supplementary material
Source: PubMed Central journal article supplement (PMC2629246)
Supplement: 0806649105_ST3_PDF.pdf [file 0806649105_ST3_PDF.pdf]

Table S3. Statistics of the TGAM used to describe the threshold in the zooplankton dynamics

| Model selection (best model) |           |              |       |       |     | Test statistics for the best model |                 |       |      |       |
|------------------------------|-----------|--------------|-------|-------|-----|------------------------------------|-----------------|-------|------|-------|
| Response                     | Threshold | $r^2$ (adj.) | $P$   | $GCV$ | $n$ | Term                               | Sprat abundance | $F$   | $df$ | $P$   |
| PC1 zooplankton              | 16.98     | 0.42         | 0.025 | 0.67  | 29  | PC1 hydrology                      | < 16.98         | 5.91  | 1.70 | 0.008 |
|                              |           |              |       |       |     | Sprat abundance                    | > 16.98         | 13.34 | 1.00 | 0.001 |

The threshold is selected minimizing the Generalized Cross Validation score ( $GCV$ ) of the model after running it for 100 possible threshold values between the 0.1 lower and the 0.9 upper quantiles (best model). Test statistics for the best model are indicated. Threshold refers to the sprat abundance value ( $10^{10}$  individuals). In accordance to the piecewise regression analysis (Table S2) and the probability density distributions of the bootstrapped correlation coefficients (Table S4), our TGAM formulation incorporated the effect of hydro-climate variability on the zooplankton dynamic for low abundance of sprat, and the shift toward a sprat-regulated dynamic for high abundance of the planktivore predator, as follows:

$$PC1.zooplankton = \begin{cases} \alpha + s_1(PC1.hydrology) + \varepsilon & \text{if } Sprat \leq t \\ \alpha + s_2(Sprat) + \varepsilon & \text{if } Sprat > t \end{cases}$$

where  $t$  is the threshold in the sprat abundance at which the model switches between the two formulations,  $s_1$  and  $s_2$  are two smoothing functions,  $\alpha$  is the intercept and  $\varepsilon$  is the random error. See Fig. S1 for detailed results.
